# Supplementary material for: FcRγ-dependent immune activation initiates astrogliosis during the asymptomatic phase of Sandhoff disease model mice
Source: PubMed Central journal article supplement (PMC5234013; doi:10.1038/srep40518), 2017-01-13
Supplement: srep40518-s1.pdf [file srep40518-s1.pdf]

## SUPPLEMENTARY INFORMATION

### **FcR $\gamma$ -dependent immune activation initiates astrogliosis during the asymptomatic phase of Sandhoff disease model mice**

Yasuhiro Ogawa<sup>1</sup>, Takafumi Sano<sup>1</sup>, Masahiro Irisa<sup>1</sup>, Takashi Kodama<sup>2</sup>, Takahiro Saito<sup>1</sup>, Eiri Furusawa<sup>1</sup>, Katsutoshi Kaizu<sup>1</sup>, Yusuke Yanagi<sup>1</sup>, Takahiro Tsukimura<sup>2</sup>, Tadayasu Togawa<sup>2</sup>, Shoji Yamanaka<sup>3</sup>, Khoji Itoh<sup>4</sup>, Hitoshi Sakuraba<sup>5</sup>, and Kazuhiko Oishi<sup>1\*</sup>

<sup>1</sup>Department of Pharmacology, Meiji Pharmaceutical University, Tokyo, Japan,

<sup>2</sup>Department of Functional Bioanalysis, Meiji Pharmaceutical University, Tokyo, Japan,

<sup>3</sup>Department of Pathology, Yokohama City University School of Medicine, Yokohama, Japan,

<sup>4</sup>Department of Medicinal Biotechnology, Institute for Medicinal Research, Graduate School of Pharmaceutical Sciences, The University of Tokushima, Tokushima, Japan,

and <sup>5</sup>Department of Clinical Genetics, Meiji Pharmaceutical University, Tokyo, Japan.

Table S1. Top 50 up-regulated genes in cortices of 16-week-old *Hexb*<sup>-/-</sup> mice (n=4, *P*<0.05).

| Gene accession No. | Gene symbol          | Gene name                                                                | Fold change |
|--------------------|----------------------|--------------------------------------------------------------------------|-------------|
| NM_017372          | <i>Lyz2</i>          | Lysozyme 2                                                               | 3.59        |
| NM_011337          | <i>Ccl3</i>          | Chemokine (C-C motif) ligand 3                                           | 3.43        |
| NM_001081957       | <i>Wfdc17</i>        | WAP four-disulfide core domain 17                                        | 3.07        |
| NM_021274          | <i>Cxcl10</i>        | Chemokine (C-X-C motif) ligand 10                                        | 2.87        |
| NM_009977          | <i>Cst7</i>          | Cystatin F                                                               | 2.58        |
| NM_009853          | <i>Cd68</i>          | CD68 antigen                                                             | 2.48        |
| NM_010821          | <i>Mpeg1</i>         | Macrophage expressed gene 1                                              | 2.41        |
| NM_009779          | <i>C3ar1</i>         | Complement component 3a receptor 1                                       | 2.32        |
| NM_009780          | <i>C4b</i>           | Complement component 4B                                                  | 2.30        |
| NM_010501          | <i>Ifit3</i>         | Interferon-induced protein with tetratricopeptide repeats 3              | 2.00        |
| NM_013489          | <i>Cd84</i>          | CD84 antigen                                                             | 1.98        |
| NM_011662          | <i>Tyrobp</i>        | TYRO protein tyrosine kinase binding protein                             | 1.96        |
| NM_030691          | <i>Igsf6</i>         | Immunoglobulin superfamily, member 6                                     | 1.92        |
| NM_030720          | <i>Gpr84</i>         | G protein-coupled receptor 84                                            | 1.91        |
| NM_001077189       | <i>Fcgr2b</i>        | Fc receptor, IgG, low affinity IIb                                       | 1.90        |
| NM_031254          | <i>Trem2</i>         | Triggering receptor expressed on myeloid cells 2                         | 1.87        |
| NM_010277          | <i>Gfap</i>          | Glial fibrillary acidic protein                                          | 1.86        |
| NM_001111058       | <i>Cd33</i>          | CD33 antigen                                                             | 1.85        |
| NM_011150          | <i>Lgals3bp</i>      | Lectin, galactoside-binding, soluble, 3 binding protein                  | 1.84        |
| NM_010130          | <i>Emr1</i>          | EGF-like module containing, mucin-like, hormone receptor-like sequence 1 | 1.82        |
| NM_008534          | <i>Ly9</i>           | Lymphocyte antigen 9                                                     | 1.76        |
| NM_010554          | <i>Il1a</i>          | Interleukin 1 alpha                                                      | 1.69        |
| NM_001166409       | <i>Rbm3</i>          | RNA binding motif protein 3                                              | 1.68        |
| NM_019549          | <i>Plek</i>          | Pleckstrin                                                               | 1.67        |
| NM_001267695       | <i>Ctss</i>          | Cathepsin S                                                              | 1.65        |
| NM_010185          | <i>Fcer1g</i>        | Fc receptor, IgE, high affinity I, gamma polypeptide                     | 1.65        |
| NM_023065          | <i>Ifi30</i>         | Interferon gamma inducible protein 30                                    | 1.64        |
| NM_139142          | <i>Slc6a20a</i>      | Solute carrier family 6 member 20A                                       | 1.64        |
| NM_008220          | <i>Hbb-bt</i>        | Hemoglobin, beta adult t chain                                           | 1.64        |
| NM_007806          | <i>Cyba</i>          | Cytochrome b-245, alpha polypeptide                                      | 1.63        |
| NM_007572          | <i>C1qa</i>          | Complement component 1, q subcomponent, alpha polypeptide                | 1.63        |
| NM_020008          | <i>Clec7a</i>        | C-type lectin domain family 7, member a                                  | 1.63        |
| NM_010188          | <i>Fcgr3</i>         | Fc receptor, IgG, low affinity III                                       | 1.62        |
| NM_008331          | <i>Ifit1</i>         | Interferon-induced protein with tetratricopeptide repeats 1              | 1.60        |
| NM_007574          | <i>C1qc</i>          | Complement component 1, q subcomponent, C chain                          | 1.60        |
| AK006938           | <i>1700072H12Rik</i> | 1700072H12 product:hypothetical protein                                  | 1.61        |
| NM_001083955       | <i>Hba-a2</i>        | Hemoglobin alpha, adult chain 2                                          | 1.60        |
| NM_013590          | <i>Lyz1</i>          | Lysozyme 1                                                               | 1.60        |
| NM_134158          | <i>AF251705</i>      | cDNA sequence AF251705                                                   | 1.58        |
| NM_021334          | <i>Itgax</i>         | Integrin alpha X                                                         | 1.58        |
| NM_008218          | <i>Hba-a1</i>        | Hemoglobin alpha, adult chain 1                                          | 1.57        |
| NM_007649          | <i>Cd48</i>          | CD48 antigen                                                             | 1.56        |
| NM_001042489       | <i>Hvcn1</i>         | Hydrogen voltage-gated channel 1                                         | 1.55        |
| NM_027836          | <i>Ms4a7</i>         | Membrane-spanning 4-domains, subfamily A, member 7                       | 1.55        |
| NM_008479          | <i>Lag3</i>          | Lymphocyte-activation gene 3                                             | 1.54        |
| NM_009777          | <i>C1qb</i>          | Complement component 1, q subcomponent, beta polypeptide                 | 1.53        |
| NM_011332          | <i>Ccl17</i>         | Chemokine (C-C motif) ligand 17                                          | 1.52        |
| NM_025378          | <i>Ifitm3</i>        | Interferon induced transmembrane protein 3                               | 1.52        |
| NM_001204910       | <i>AI607873</i>      | Expressed sequence AI607873                                              | 1.52        |
| NM_013706          | <i>Cd52</i>          | CD52 antigen                                                             | 1.52        |

Table S2. Top 50 down-regulated genes in cortices of 16-week-old *Hexb*<sup>-/-</sup> mice (n=4, *P*<0.05).

| Gene accession No. | Gene symbol          | Gene name                                                                                 | Fold change |
|--------------------|----------------------|-------------------------------------------------------------------------------------------|-------------|
| NR_004414          | <i>Rnu2-10</i>       | <i>U2 small nuclear RNA 10</i>                                                            | 1.73        |
| NR_029412          | <i>Snora16a</i>      | <i>Small nucleolar RNA, H/ACA box 16A</i>                                                 | 1.71        |
| NM_023842          | <i>Dsp</i>           | <i>Desmoplakin</i>                                                                        | 1.68        |
| NM_177068          | <i>Olfml2b</i>       | <i>Olfactomedin-like 2B</i>                                                               | 1.68        |
| NM_138304          | <i>Calml4</i>        | <i>Calmodulin-like 4</i>                                                                  | 1.67        |
| NR_002905          | <i>Snora74a</i>      | <i>Small nucleolar RNA, H/ACA box 74A</i>                                                 | 1.66        |
| NM_026956          | <i>Cd209f</i>        | <i>CD209f antigen</i>                                                                     | 1.65        |
| XM_003086154       | <i>Vwa3b</i>         | <i>Von Willebrand factor A domain containing 3B</i>                                       | 1.64        |
| NR_045188          | <i>St18</i>          | <i>Suppression of tumorigenicity 18</i>                                                   | 1.63        |
| NM_029972          | <i>Ernm</i>          | <i>Ermin, ERM-like protein</i>                                                            | 1.58        |
| NR_004439          | <i>Rprl2</i>         | <i>Ribonuclease P RNA-like 2</i>                                                          | 1.54        |
| NM_028390          | <i>Anln</i>          | <i>Anillin, actin binding protein</i>                                                     | 1.54        |
| NM_146257          | <i>Slc29a4</i>       | <i>Solute carrier family 29, member 4</i>                                                 | 1.53        |
| NM_001081078       | <i>Lct</i>           | <i>Lactase</i>                                                                            | 1.52        |
| NM_009026          | <i>Rasd1</i>         | <i>RAS, dexamethasone-induced 1</i>                                                       | 1.51        |
| NR_033336          | <i>Snora23</i>       | <i>Small nucleolar RNA, H/ACA box 23</i>                                                  | 1.51        |
| NM_008937          | <i>Prox1</i>         | <i>Prospero homeobox 1</i>                                                                | 1.51        |
| NM_011674          | <i>Ugt8a</i>         | <i>UDP galactosyltransferase 8A</i>                                                       | 1.49        |
| NM_001252552       | <i>Folr1</i>         | <i>Folate receptor 1</i>                                                                  | 1.47        |
| NR_026942          | <i>E330013P04Rik</i> | <i>RIKEN cDNA E330013P04 gene</i>                                                         | 1.46        |
| NM_133238          | <i>Cd209a</i>        | <i>CD209a antigen</i>                                                                     | 1.44        |
| NR_028078          | <i>Snora21</i>       | <i>Small nucleolar RNA, H/ACA box 21</i>                                                  | 1.44        |
| NR_046306          | <i>DQ267102</i>      | <i>SnoRNA DQ267102</i>                                                                    | 1.44        |
| NM_001100182       | <i>Cyp2j12</i>       | <i>Cytochrome P450, family 2, subfamily j, polypeptide 12</i>                             | 1.42        |
| NM_153156          | <i>Stoml3</i>        | <i>Stomatin (Epb7.2)-like 3</i>                                                           | 1.42        |
| NM_178685          | <i>Pcdh20</i>        | <i>Protocadherin 20</i>                                                                   | 1.42        |
| NM_015743          | <i>Nr4a3</i>         | <i>Nuclear receptor subfamily 4, group A, member 3</i>                                    | 1.41        |
| NM_178086          | <i>Fa2h</i>          | <i>Fatty acid 2-hydroxylase</i>                                                           | 1.41        |
| NM_010762          | <i>Mal</i>           | <i>Myelin and lymphocyte protein, T cell differentiation protein</i>                      | 1.41        |
| NM_080726          | <i>Rem2</i>          | <i>Rad and gem related GTP binding protein 2</i>                                          | 1.41        |
| NM_024413          | <i>Plekhf1</i>       | <i>Pleckstrin homology domain containing, family F (with FYVE domain) member 1</i>        | 1.40        |
| NR_046144          | <i>n-R5s136</i>      | <i>Nuclear encoded rRNA 5S 136</i>                                                        | 1.39        |
| NM_011177          | <i>Klk6</i>          | <i>Kallikrein related-peptidase 6</i>                                                     | 1.39        |
| NR_004434          | <i>Rprl1</i>         | <i>Ribonuclease P RNA-like 1</i>                                                          | 1.39        |
| NM_008037          | <i>Fosl2</i>         | <i>Fos-like antigen 2</i>                                                                 | 1.39        |
| NR_004412          | <i>Rnu1b1</i>        | <i>U1b1 small nuclear RNA</i>                                                             | 1.38        |
| NM_153520          | <i>Opalin</i>        | <i>Oligodendrocytic myelin paranodal and inner loop protein</i>                           | 1.38        |
| NM_010153          | <i>ErbB3</i>         | <i>V-erb-b2 erythroblastic leukemia viral oncogene homolog 3</i>                          | 1.37        |
| NM_177624          | <i>Sntn</i>          | <i>Sentan, cilia apical structure protein</i>                                             | 1.37        |
| NM_026731          | <i>Ppp1r14a</i>      | <i>Protein phosphatase 1, regulatory (inhibitor) subunit 14A</i>                          | 1.37        |
| NM_001033349       | <i>Gm410</i>         | <i>Predicted gene 410</i>                                                                 | 1.35        |
| NM_001013374       | <i>Lman2l</i>        | <i>Lectin, mannose-binding 2-like</i>                                                     | 1.35        |
| NR_001460          | <i>Rmrp</i>          | <i>RNA component of mitochondrial RNAase P</i>                                            | 1.35        |
| NM_010338          | <i>Gpr37</i>         | <i>G protein-coupled receptor 37</i>                                                      | 1.34        |
| NM_009398          | <i>Tnfaip6</i>       | <i>Tumor necrosis factor alpha induced protein 6</i>                                      | 1.34        |
| NM_029001          | <i>Elovl7</i>        | <i>ELOVL family member 7, elongation of long chain fatty acids</i>                        | 1.34        |
| NM_025821          | <i>Carhsp1</i>       | <i>Calcium regulated heat stable protein 1</i>                                            | 1.34        |
| NM_001042715       | <i>Ccdc135</i>       | <i>Coiled-coil domain containing 135</i>                                                  | 1.34        |
| NM_198102          | <i>Tra2a</i>         | <i>Transformer 2 alpha homolog</i>                                                        | 1.33        |
| NM_001161767       | <i>Galnt6</i>        | <i>UDP-N-acetyl-alpha-D-galactosamine:polypeptide N-acetylgalactosaminyltransferase 6</i> | 1.33        |

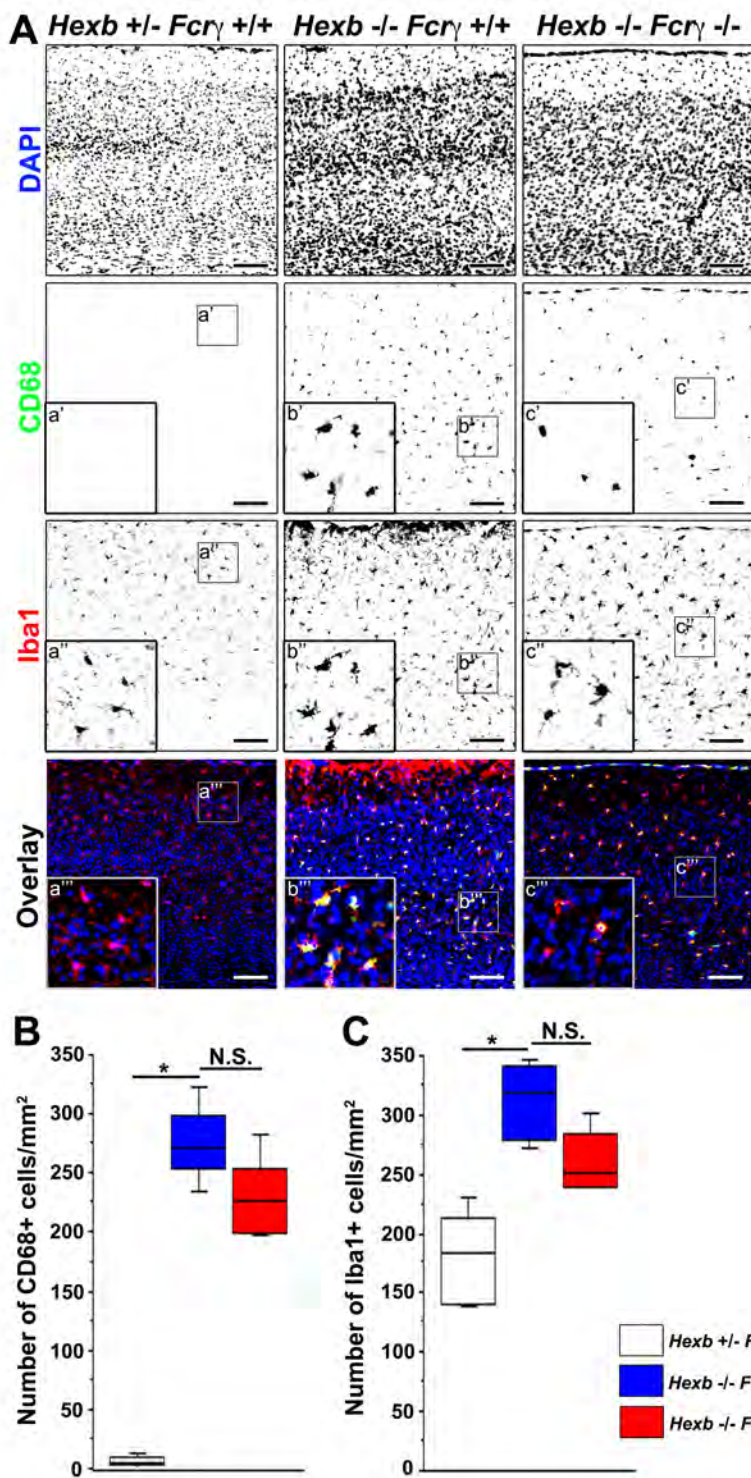

**Figure S1.** Reduction in microglial activity in cortices of *Hexb*<sup>-/-</sup> *Fcγ*<sup>-/-</sup> mice at 16 weeks. *A*, Immunostaining of coronal sections for CD68 (green) and Iba1 (red) in the cerebral cortices of *Hexb*<sup>+/-</sup> *Fcγ*<sup>+/+</sup>, *Hexb*<sup>-/-</sup> *Fcγ*<sup>+/+</sup>, and *Hexb*<sup>-/-</sup> *Fcγ*<sup>-/-</sup> mice at 16 weeks. Blue represents DAPI staining. Insets (a–c) show magnified views of the boxed regions. Scale bar, 100  $\mu$ m. *B* and *C*, Quantitative analysis for the number of CD68+ (*B*) and Iba1+ (*C*) cell immune signals in the cerebral cortices of *Hexb*<sup>+/-</sup> *Fcγ*<sup>+/+</sup>, *Hexb*<sup>-/-</sup> *Fcγ*<sup>+/+</sup>, and *Hexb*<sup>-/-</sup> *Fcγ*<sup>-/-</sup> mice at 16 weeks. Boxes, 25<sup>th</sup>–75<sup>th</sup> percentile with the median indicated; bars, 10<sup>th</sup> and 90<sup>th</sup> percentiles. Analyzed using a Kruskal–Wallis test (nonparametric ANOVA) followed by a Dunn’s post hoc test ( $n=5$ ). N.S.: difference not significant ( $P>0.05$ ),  $*P<0.05$ .

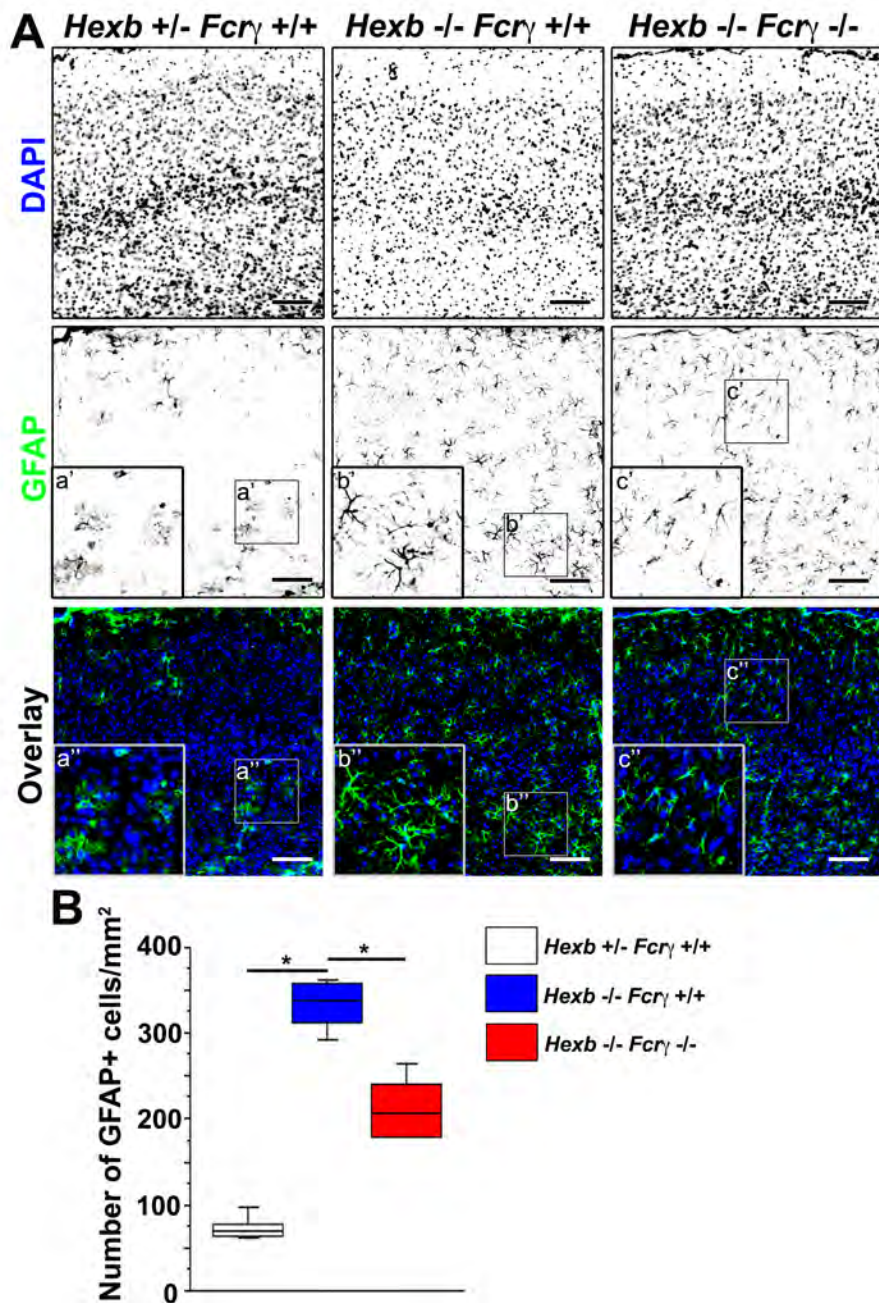

**Figure S2.** Reduction in reactive astrogliosis in cortices of *Hexb*<sup>-/-</sup> *FcRγ*<sup>-/-</sup> mice at 16 weeks. *A*, Immunostaining of coronal sections for GFAP (green) in the cerebral cortices of *Hexb*<sup>+/-</sup> *FcRγ*<sup>+/+</sup>, *Hexb*<sup>-/-</sup> *FcRγ*<sup>+/+</sup>, and *Hexb*<sup>-/-</sup> *FcRγ*<sup>-/-</sup> mice at 16 weeks. Blue represents DAPI staining. Insets (a–c) show magnified views of the boxed regions. Scale bar, 100 μm. *B*, Quantitative analysis for the number of GFAP+ cell immune signals in the cerebral cortices of *Hexb*<sup>+/-</sup> *FcRγ*<sup>+/+</sup>, *Hexb*<sup>-/-</sup> *FcRγ*<sup>+/+</sup>, and *Hexb*<sup>-/-</sup> *FcRγ*<sup>-/-</sup> mice at 16 weeks. Boxes, 25<sup>th</sup>–75<sup>th</sup> percentile with the median indicated; bars, 10<sup>th</sup> and 90<sup>th</sup> percentiles. Analyzed using a Kruskal–Wallis test (nonparametric ANOVA) followed by a Dunn’s post hoc test (n=5). \**P*<0.05.



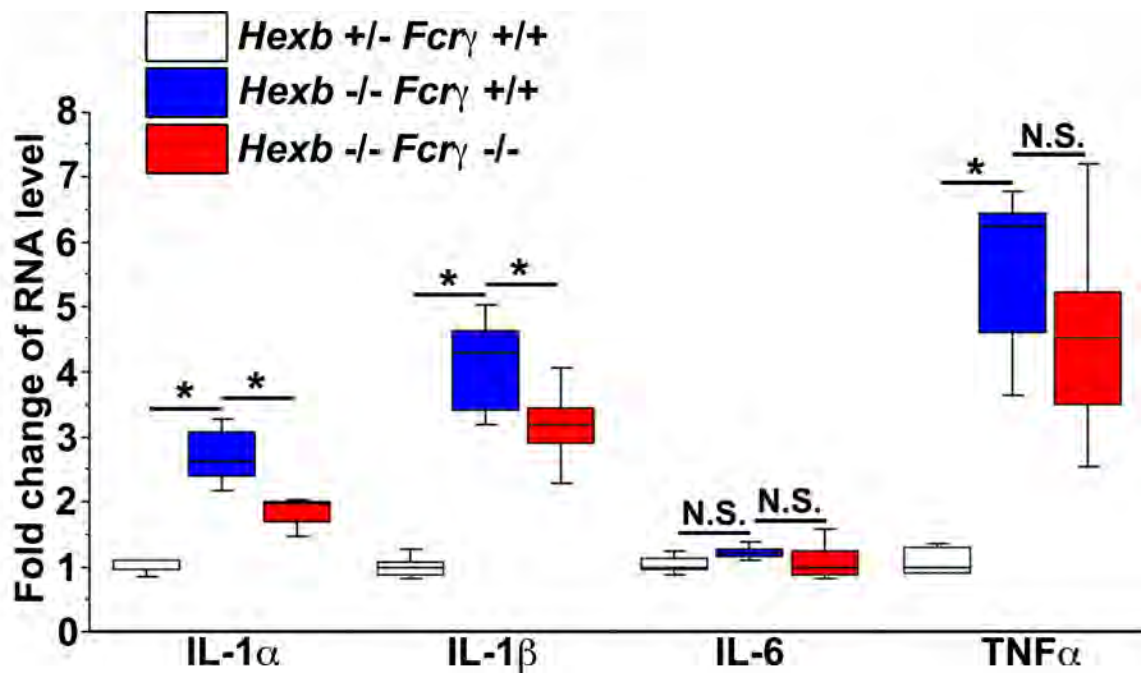

**Figure S3.** mRNA expression levels were measured by real-time PCR. Expression levels were standardized by those of 18S ribosomal RNA. The values show relative gene expression levels in the cerebral cortices of *Hexb*<sup>+/-</sup> *FcR $\gamma$* <sup>+/+</sup> (open box), *Hexb*<sup>-/-</sup> *FcR $\gamma$* <sup>+/+</sup> (blue box), and *Hexb*<sup>-/-</sup> *FcR $\gamma$* <sup>-/-</sup> (red box) mice at 16 weeks. Boxes, 25<sup>th</sup>–75<sup>th</sup> percentile with the median indicated; bars, 10<sup>th</sup> and 90<sup>th</sup> percentiles. Analyzed using a Kruskal–Wallis test (nonparametric ANOVA) followed by a Dunn’s post hoc test (n=5). N.S.: difference not significant ( $P>0.05$ ), \* $P<0.05$ .

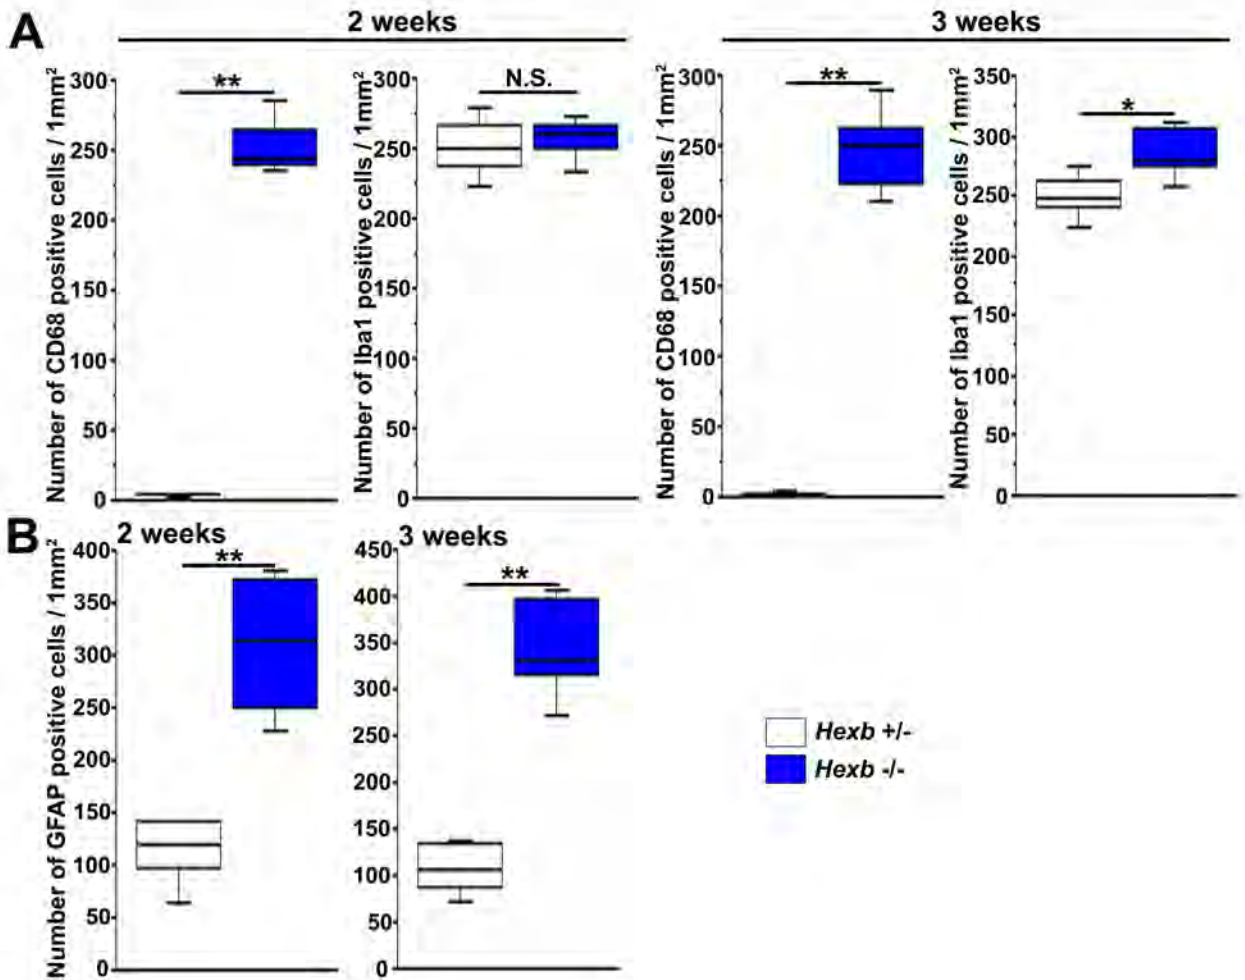

**Figure S4.** Quantitative analysis for microglial activation and astrogliosis in the cerebral cortices of *Hexb*<sup>+/-</sup> and *Hexb*<sup>-/-</sup> mice during development from 2 weeks to 3 weeks. *A*, Quantitative analysis for the number of CD68<sup>+</sup> and Iba1<sup>+</sup> cell immune signals. Median values of CD68-positive cells per 1-mm<sup>2</sup> section were 4.0 (3.5–5.0) and 244 (239–272) in 2-week-old *Hexb*<sup>+/-</sup> and *Hexb*<sup>-/-</sup> mice; 1.0 (0.5–3.0) and 251 (218–271) in 3-week-old *Hexb*<sup>+/-</sup> and *Hexb*<sup>-/-</sup> mice. Median values of Iba1-positive cells per 1-mm<sup>2</sup> section were 250 (233–271) and 260 (244–269) in 2-week-old *Hexb*<sup>+/-</sup> and *Hexb*<sup>-/-</sup> mice; 247 (235–266) and 280 (269–307) in 3-week-old *Hexb*<sup>+/-</sup> and *Hexb*<sup>-/-</sup> mice. *B*, Quantitative analysis for the number of GFAP<sup>+</sup> cell immune signals. Median values of GFAP-positive cells per 1-mm<sup>2</sup> section were 120 (87–141) and 314 (243–376) in 2-week-old *Hexb*<sup>+/-</sup> and *Hexb*<sup>-/-</sup> mice; 106 (84–136) and 332 (301–400) in 3-week-old *Hexb*<sup>+/-</sup> and *Hexb*<sup>-/-</sup> mice. Boxes, 25<sup>th</sup>–75<sup>th</sup> percentile with the median indicated; bars, 10<sup>th</sup> and 90<sup>th</sup> percentiles. Analyzed using the Mann-Whitney *U*-test (n=5). \**P*<0.05, \*\**P*<0.01. N.S.: difference not significant (*P*>0.05).

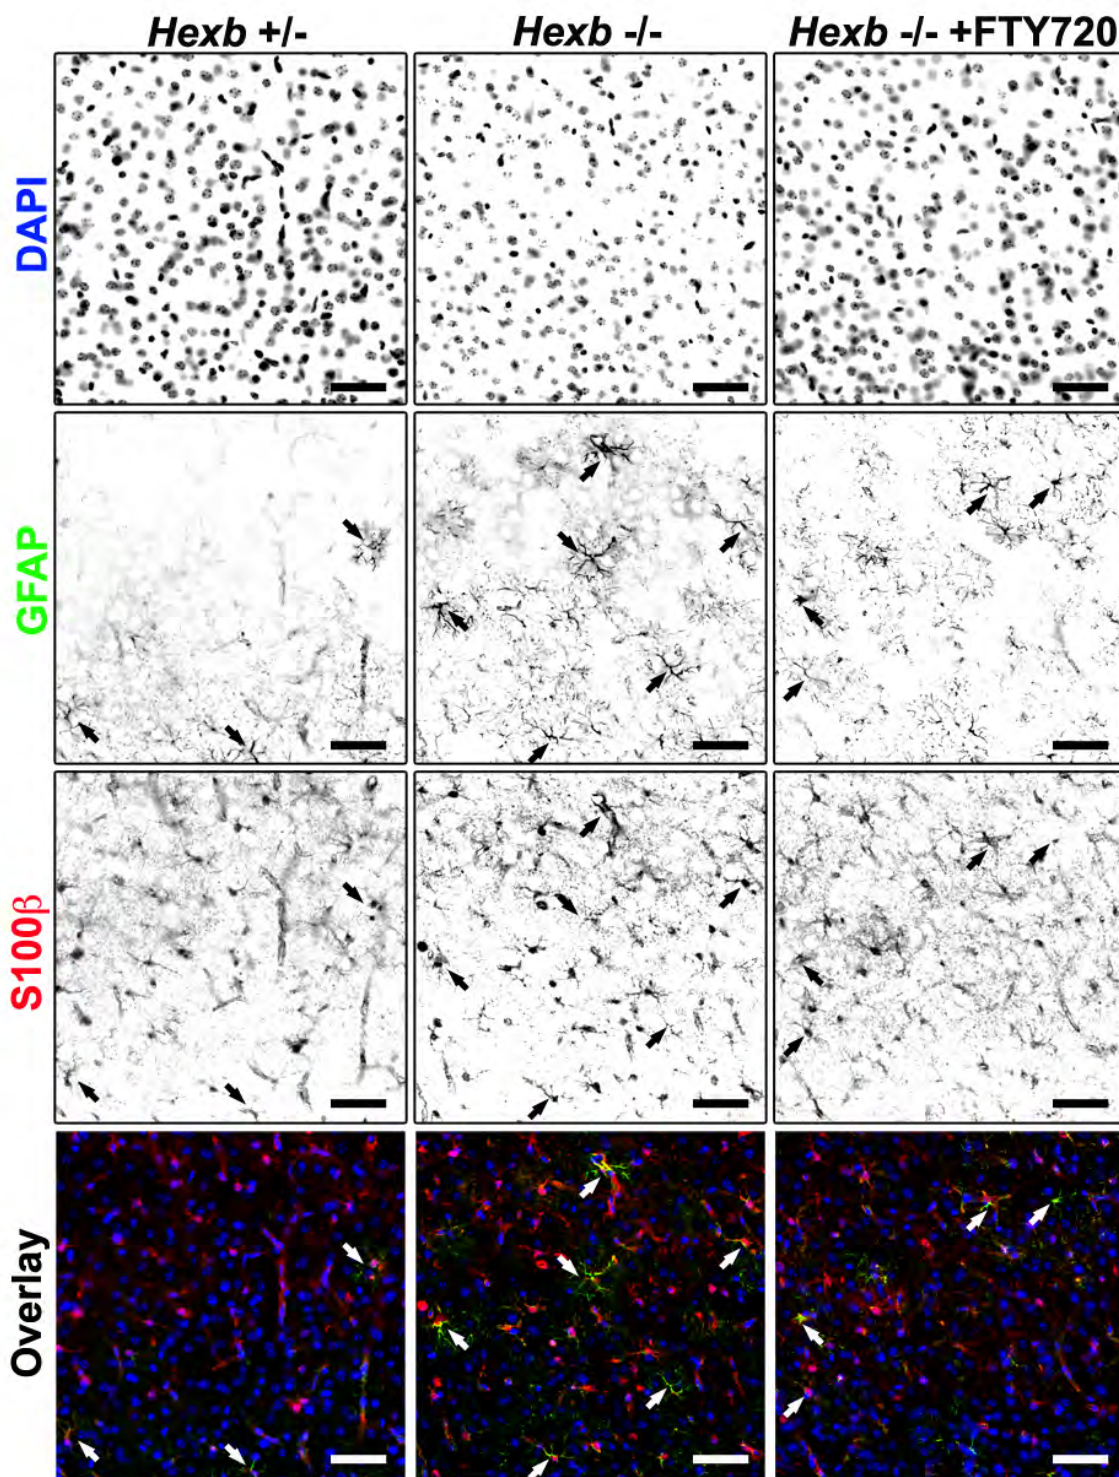

**Figure S5.** Astroglial activation in brains of 4-week-old *Hexb*<sup>-/-</sup> mice. Immunostaining of coronal sections for GFAP (green) and S100β (red) in the cerebral cortices of *Hexb*<sup>+/-</sup>, *Hexb*<sup>-/-</sup> and FTY720-treated *Hexb*<sup>-/-</sup> mice at 4 weeks. Arrows indicate GFAP / S100β double-positive cells. Blue represents DAPI staining. Scale bar, 50 μm.
